# Supplementary material
Source: PubMed Central journal article supplement (PMC4802773)
Supplement: Supplementary_Figures.pdf [file Supplementary_Figures.pdf]

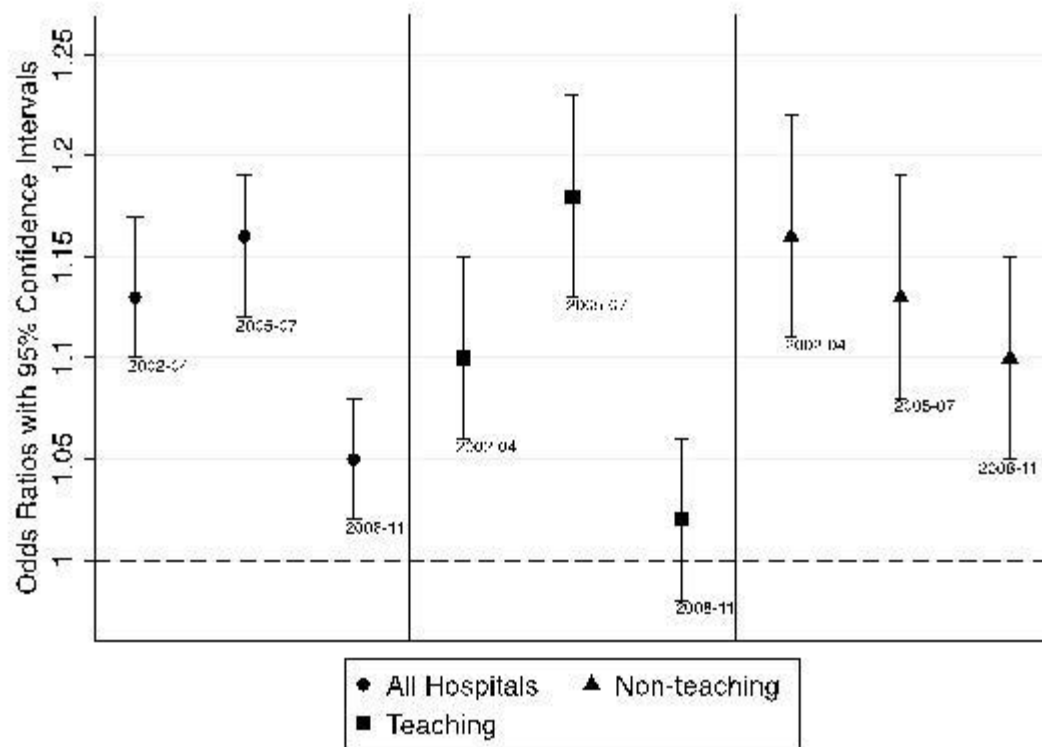

Figure 1

**Figure 1:** Odds Ratios of In-hospital Mortality in All, Teaching and Non-teaching Hospitals for Weekends Admissions from 2002-2011

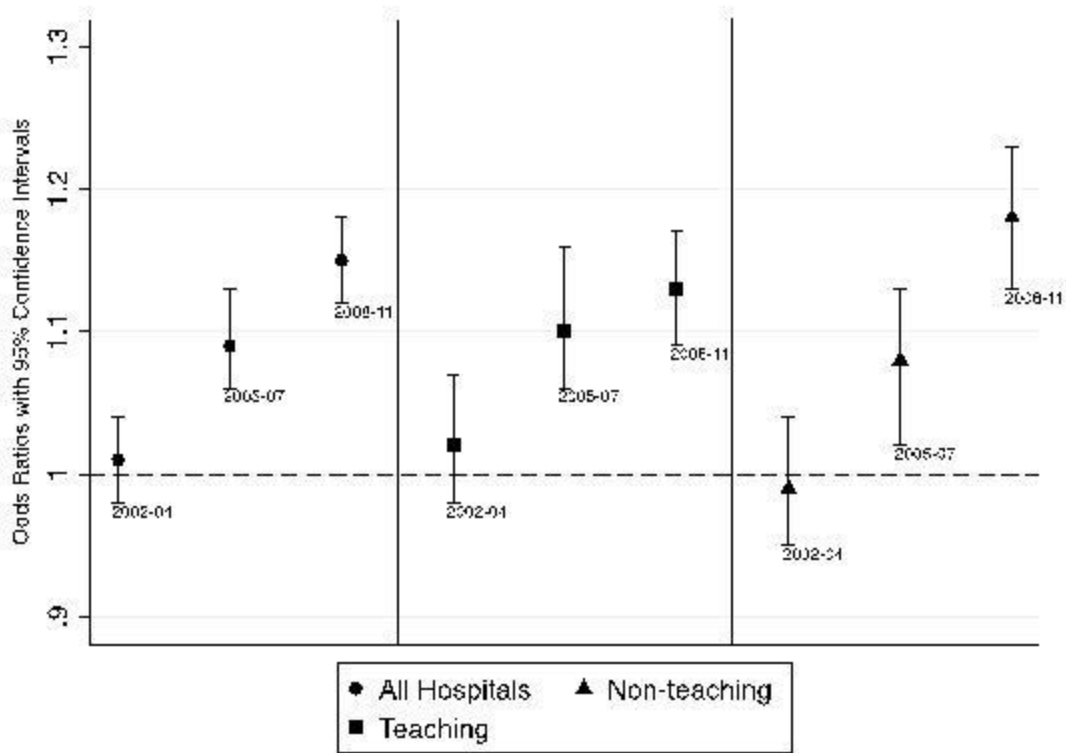

Figure II

**Figure 2:** Odds of Adverse Discharge in All, Teaching and Non-teaching Hospitals for Weekends Admissions from 2002-2011
